# Supplementary material for: A metabolic associated fatty liver disease risk variant in MBOAT7 regulates toll like receptor induced outcomes
Source: Springer Nature journal article supplement (doi:10.1038/s41467-022-35158-9), 2022-12-06
Supplement: MOESM1 [file 41467_2022_35158_MOESM1_ESM.pdf]

A metabolic associated fatty liver disease risk variant in MBOAT7 regulates toll like receptor induced outcomes

Jawaher Alharthi, Ali Bayoumi, Khaled Thabet, Ziyang Pan, Brian S. Gloss, Olivier Latchoumanin, Mischa Lundberg, Natalie A. Twine, Duncan McLeod, Shafi Alenizi, Leon A. Adams, Martin Weltman, Thomas Berg, Christopher Liddle, Jacob George, Mohammed Eslam.

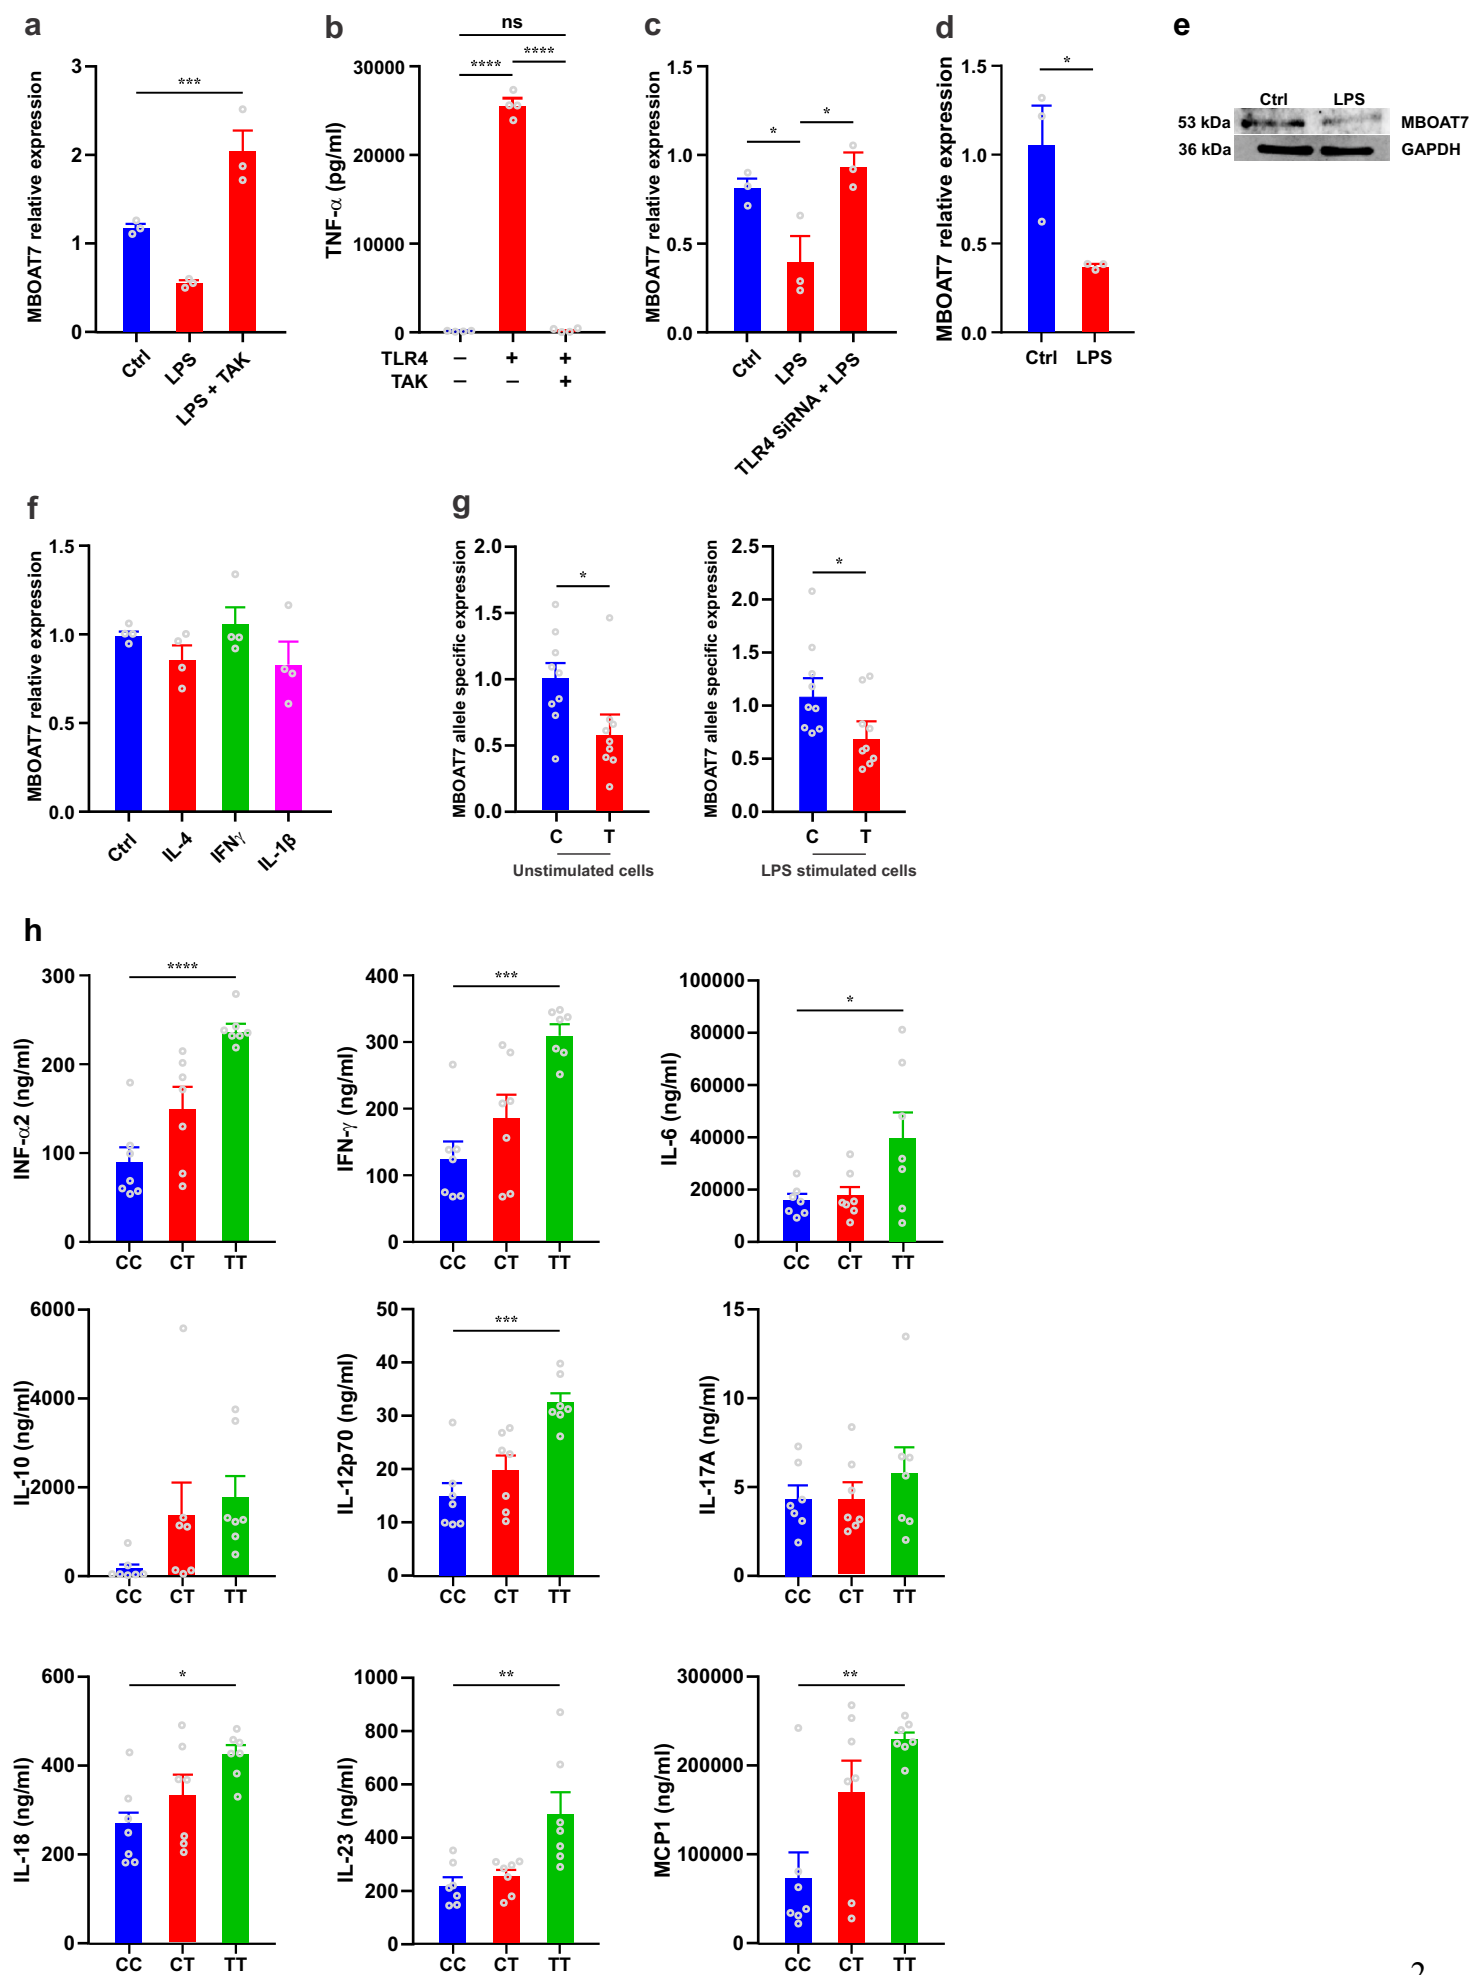



**Supplementary Figure 1:** **a)** Human MDMs from subjects heterozygous for rs8736 (n = 3) were stimulated with lipopolysaccharide (LPS) (TLR4) and / or a specific TLR4 inhibitor (TAK-242) for 24 hours and mRNA expression of MBOAT7 was analyzed by PCR and normalized to GAPDH in response to LPS stimulation. **b)** TNF- $\alpha$  levels in conditioned media measured by ELISA. **c)** Human MDMs from subjects heterozygous for rs8736 (n = 3) were stimulated with lipopolysaccharide (LPS) (TLR4) and / or a specific TLR4 SiRNA for 24 hours and mRNA expression of MBOAT7 was analyzed by PCR and normalized to GAPDH in response to LPS stimulation. **d)** Human hepatic Kupffer cells were treated with LPS for 24 hours and then examined for MBOAT7 relative mRNA expression by PCR and normalized to GAPDH. **e)** MBOAT7 protein expression by Western blot in MDMs. **f)** Human MDMs from subjects heterozygous for rs8736 were stimulated with IFN- $\gamma$ , IL-4 or IL-1 $\beta$  for 24 hours and MBOAT7 mRNA expression was assessed by PCR and normalized to untreated MDMs and GAPDH. **g)** Allele-specific expression assay showing the ratio of rs8736 alleles in genomic DNA (gDNA) and complementary DNA (cDNA; synthesized from pre-mRNA) from MDMs of heterozygous individuals either unstimulated stimulated with LPS for 24 hours (n = 9). **h)** IFN- $\alpha$ 2, IFN- $\gamma$ , IL-6, IL-10, IL-12p70, IL-17A, IL-18, IL-23, and MCP-1 production by MDMs stratified by rs8736 genotype following 24 hours stimulation with Pam3Cys4 [TLR1/2] (n = 7 per genotype). P-value < 0.04 for all comparisons. Values are represented by vertical bars and are mean  $\pm$  sem; \*P < 0.05, \*\* P < 0.01, \*\*\*\*P < 0.001. Statistical differences between groups were assessed by 2-tailed Student's t test or one-way ANOVA; multiple comparisons were corrected by Bonferroni correction. Source data are provided as a Source Data file.

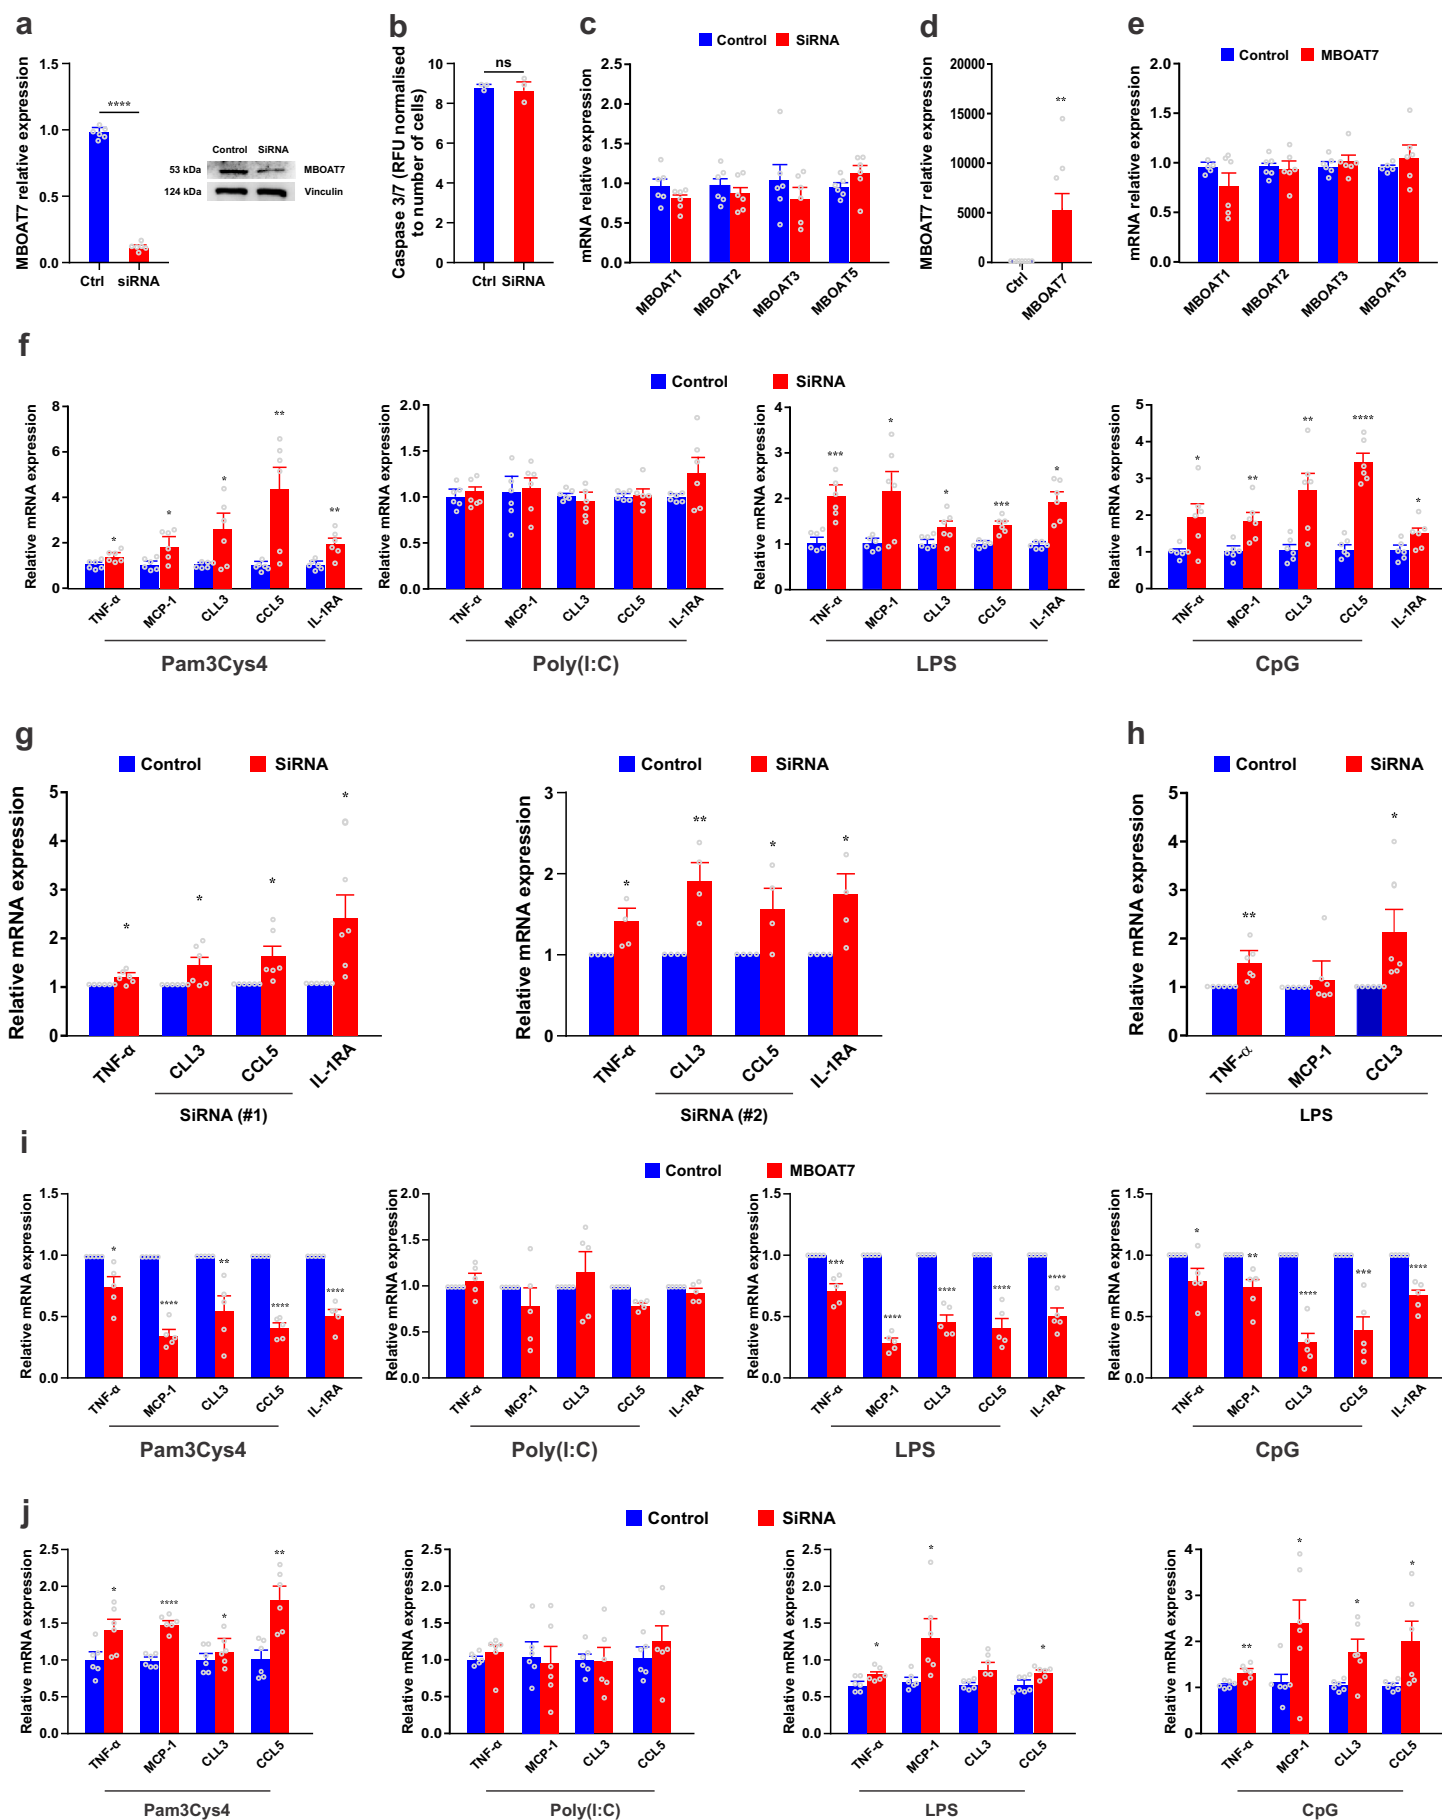

**Supplementary Figure 2:** **a)** Human MDMs were transfected with scrambled or MBOAT7 siRNA for 48 hours and MBOAT7 relative mRNA expression was assessed by RT-PCR and normalized to GAPDH and MBOAT7 protein by Western normalised to  $\alpha$ -tubulin. **b)** Transfected cells were assessed for cell viability using Caspase 3/7 activity; shown is RFU normalised to number of cells (n=3). **c)** The expression of the MBOAT family were determined by RT-PCR and normalized to GAPDH. Human MDMs were transfected with control empty vector or an MBOAT7 vector for 48 hours and **d)** MBOAT7 relative mRNA expression was assessed by RT-PCR (n=4). **e)** The expression of MBOAT family members were determined by RT-PCR. **f)** Human MDMs were transfected with MBOAT7 siRNA or scramble as control and treated with the indicated TLRs ligands (Pam3Cys4 [TLR1/2], Poly(I:C) [TLR3], LPS [TLR4] and CpG [TLR9]) for 24 hours. Shown is relative mRNA expression of different cytokines assessed by RT-PCR and normalized to GAPDH. **g)** Relative mRNA expression of different cytokines in MDMs transfected with 2 additional MBOAT7 siRNAs or scramble as control and treated with LPS for 24 hours. **h)** Human Kupffer cells were transfected with MBOAT7 siRNA or scramble as control and treated with LPS for 24 hours. Shown is relative mRNA expression of different cytokines by RT-PCR. **i)** MDMs were transfected with MBOAT7 overexpression plasmid or the empty vector as control and treated with the indicated TLRs ligands for 24 hours. Shown is relative mRNA expression of different cytokines assessed by RT-PCR and normalized to GAPDH (n=3). **j)** Human MDMs were cultured with GM-CSF and transfected with MBOAT7 siRNA or scramble and treated with the indicated TLR ligands for 24 hours. Shown is relative mRNA expression of different cytokines assessed by RT-PCR and normalized to GAPDH. (n = 6 includes 3 biological replicates and 2 technical replicates in **a, c, e, f, g, h** and **j**). P-value < 0.04 for all comparisons. Values are represented by vertical bars and are mean  $\pm$  sem; \*P < 0.05, \*\* P < 0.01, \*\*\*\*P < 0.001. Statistical differences between groups were assessed by 2-tailed Student's t test. Source data are provided as a Source Data file.



**Supplementary Figure 3:** MDMs transfected with MBOAT7 siRNA or scramble at base line and challenged with LPS for 24 h and **a)** cholesterol and **b)** triglycerides were measured (n = 4 includes 2 biological replicates from independent individuals and 2 technical replicates). **c)** Scheme illustrating the role of MBOAT7 in the Land's cycle pathway. MDMs were transfected with MBOAT7 siRNA or scramble as control (n=6); **d)** levels of Arachidonic Acid, **e)** products of the cyclooxygenase (PGE2) and lipoxygenase pathway (12-HETE), **f)** pro-resolving n-3 fatty acids eicosapentaenoic acid (EPA) and docosahexaenoic acid (DHA), **g)** LOX enzyme activity (n=4), **h)** COX-I and COX-II enzyme activity (n=4), and **i)** Phospholipase A2 enzyme activity (n=4). **j)** Effect of inhibition of key enzymes in the eicosanoids production pathway on TNF- $\alpha$  secretion assessed by ELISA in conditional media of MDMs (n=3-5). P-value < 0.04 for all comparisons. Values are represented by vertical bars and are mean  $\pm$  sem; \* $P$  < 0.05, \*\* $P$  < 0.01, \*\*\*\* $P$  < 0.001. Statistical differences between groups were assessed by 2-tailed Student's t test. Source data are provided as a Source Data file.

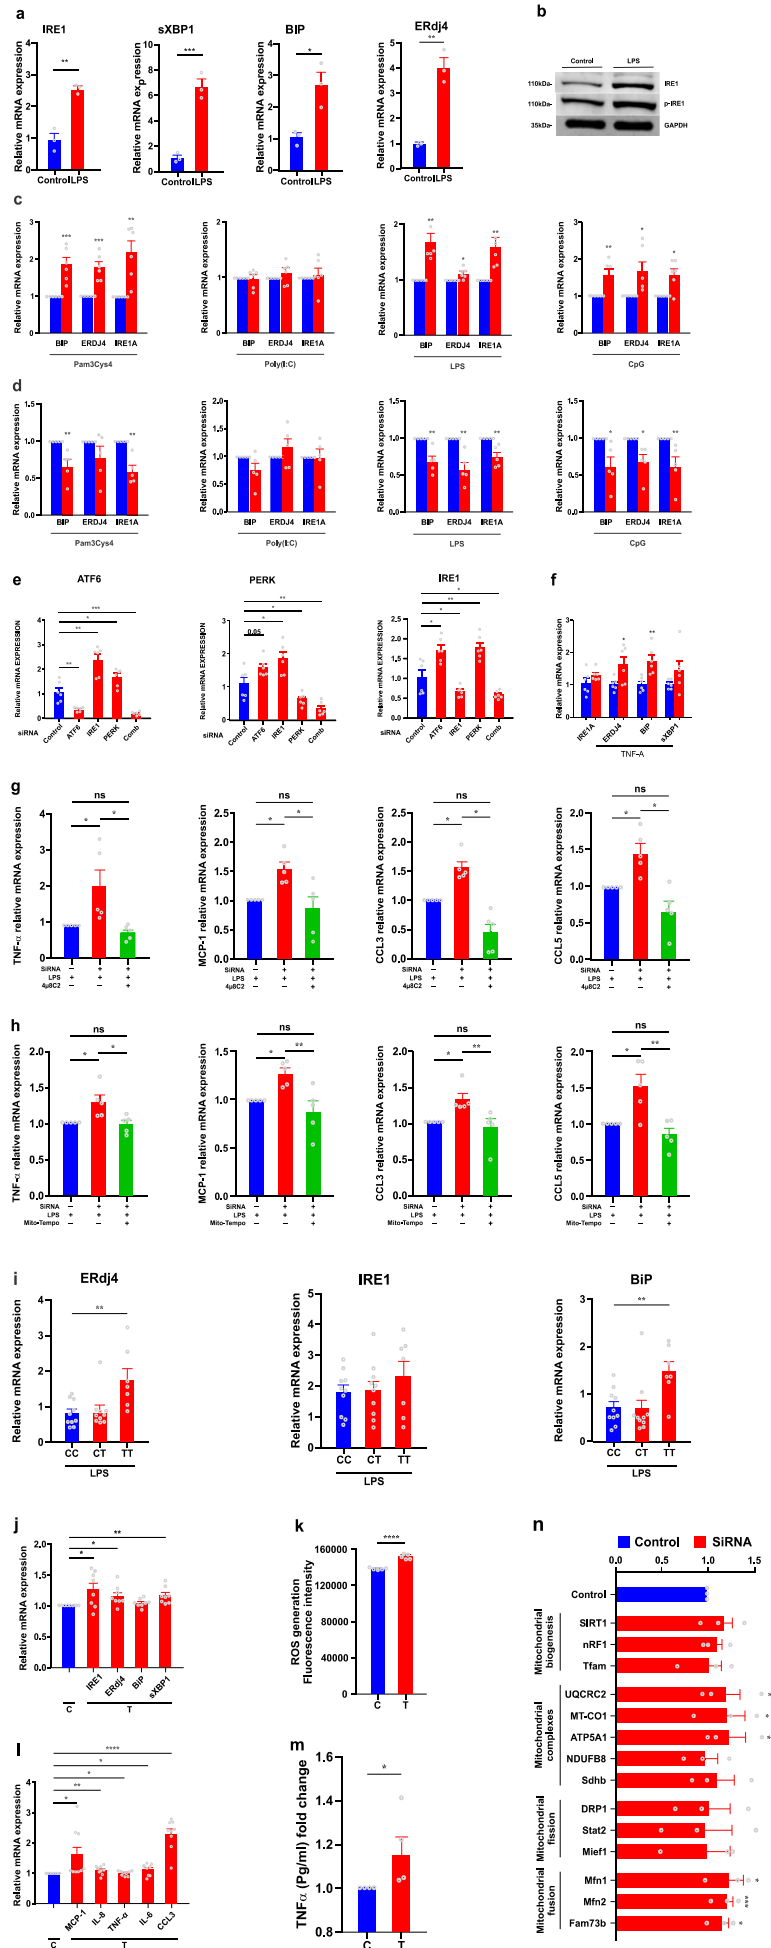

**Supplementary Figure 4:** MDMs were treated with LPS or control for 24h (n=3). Shown is **a)** Relative mRNA expression of different ER stress markers assessed by RT-PCR and **b)** IRE1 and p-IRE1 protein expression by Western blot. Relative mRNA expression of ER stress markers by RT-PCR in MDMs transfected with **c)** MBOAT7 siRNA or scramble or **d)** MBOAT7 overexpression plasmid or the empty vector after 24h of treatment with the indicated TLRs ligands (n = 5-6; 3 biological replicates and 1-2 technical replicates). **e)** Relative mRNA expression of ATF6, PERK and IRE1 by RT-PCR in MDMs transfected with scramble, ATF6 siRNA, IRE1 siRNA, PERK siRNA or combination of the three siRNAs for 48h and treated with LPS for 24h. **f)** Relative mRNA expression of different ER stress markers by RT-PCR in MDMs treated with TNF- $\alpha$  (n = 6; 3 biological replicates and 2 technical replicates). Relative mRNA expression of different cytokines by RT-PCR in MDMs transfected with scramble or MBOAT7 siRNA for 48h and treated with LPS only or in combination with **g)** 4 $\mu$ 8C (IREA1 inhibitor) or with **h)** Mito-TEMPO (mitochondria-targeted antioxidant) for 24h (n = 5; 3 biological replicates and 1-2 technical replicates). **i)** Relative mRNA expression of ER stress markers in MDMs from subjects of all genotypes for rs8736 and challenged with LPS for 24h (n=7–10/genotype). HeLa cells were transfected with full-length 3'UTRs of MBOAT7 containing either the C or the T allele (n=3) and analysed for; **j)** Relative mRNA expression of different ER stress markers, **k)** ROS generation, **l)** Relative mRNA expression of different cytokines (n = 8, 5, and 9; 3 biological replicates and 2-3 technical replicates, respectively) and **m)** Secreted TNF- $\alpha$  levels measured by ELISA (n=3). **n)** MDMs were transfected with scramble or MBOAT7 siRNA for 48h then examined for the relative mRNA expression levels of several regulators of mitochondrial dynamics(n=3). P-value < 0.04 for all comparisons. Values are represented by vertical bars and are mean  $\pm$  sem; \*P<0.05, \*\* P<0.01, \*\*\*\*P<0.001. Statistical differences between groups were assessed by 2-tailed Student's t test or one-way ANOVA; multiple comparisons were corrected by Bonferroni correction. Source data are provided as a Source Data file.

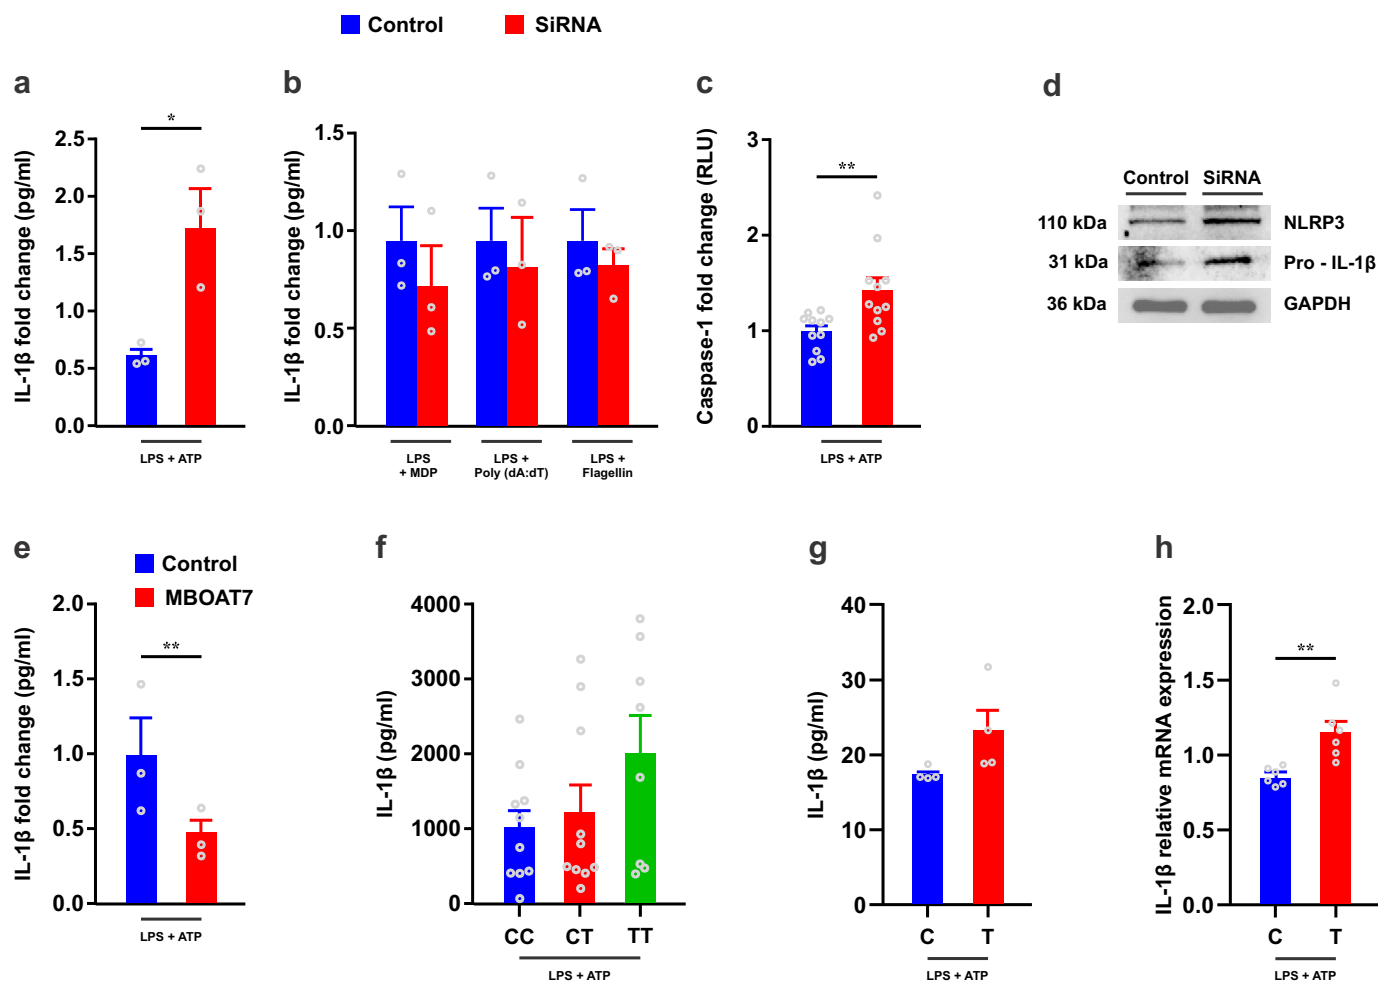



**Supplementary Figure 5:** MDMs were transfected with MBOAT7 siRNA or scramble as control and incubated with LPS (500 ng/ml, 4 h) (n=3) and then **a)** treated with NLRP3 inflammasome activator ATP (5 mM, 30 min), **b)** NLRP1 inflammasome activator muramyl dipeptide (MDP) (200 ng/ml, 8h), the NLRC4 inflammasome activator flagellin ((200 ng/ml, 8h), or the AIM2 inflammasome activator poly(dA:dT) (1 ug/ml, 8h) and quantitative ELISA of the conditional media measuring IL-1 $\beta$  levels is shown. **c)** MBOAT7 silencing led to higher levels of active caspase-1(n = 11 includes 3 biological replicates from independent individuals and 3-4 technical replicates), **d)** and protein levels of pro- IL-1 $\beta$  and NLRP3 upon NLRP3 inflammasome activation **e)** MDMs were transfected with MBOAT7 overexpression plasmid or the empty vector as control and incubated with LPS (500 ng/ml, 4 h) (n=3) and then treated with NLRP3 inflammasome activator ATP (5 mM, 30 min) and quantitative ELISA of the conditional media measuring IL-1 $\beta$  levels is shown. **f)** MDMs (n = 10/genotype) were treated with LPS (500 ng/ml, 4 h) and then treated with NLRP3 inflammasome activator ATP (5 mM, 30 min) and the secreted IL-1 $\beta$  levels were measured by quantitative ELISA. Human HeLa cells were transfected with full-length 3'UTRs of MBOAT7 containing either the C or the T allele and incubated with LPS (500 ng/ml, 4 h) and then treated with NLRP3 inflammasome activator ATP (5 mM, 30 min) (n=4-6) analysed for **g)** IL-1 $\beta$  secretion using quantitative ELISA and **h)** IL-1 $\beta$  mRNA expression using RT-PCR. Data was normalised to GAPDH. P-value < 0.02 for all comparisons. Values are represented by vertical bars and are mean  $\pm$  sem; \*P < 0.05, \*\* P < 0.01, \*\*\*\*P < 0.001. Statistical differences between groups were assessed by 2-tailed Student's t test or one-way ANOVA; multiple comparisons were corrected by Bonferroni correction. Source data are provided as a Source Data file.

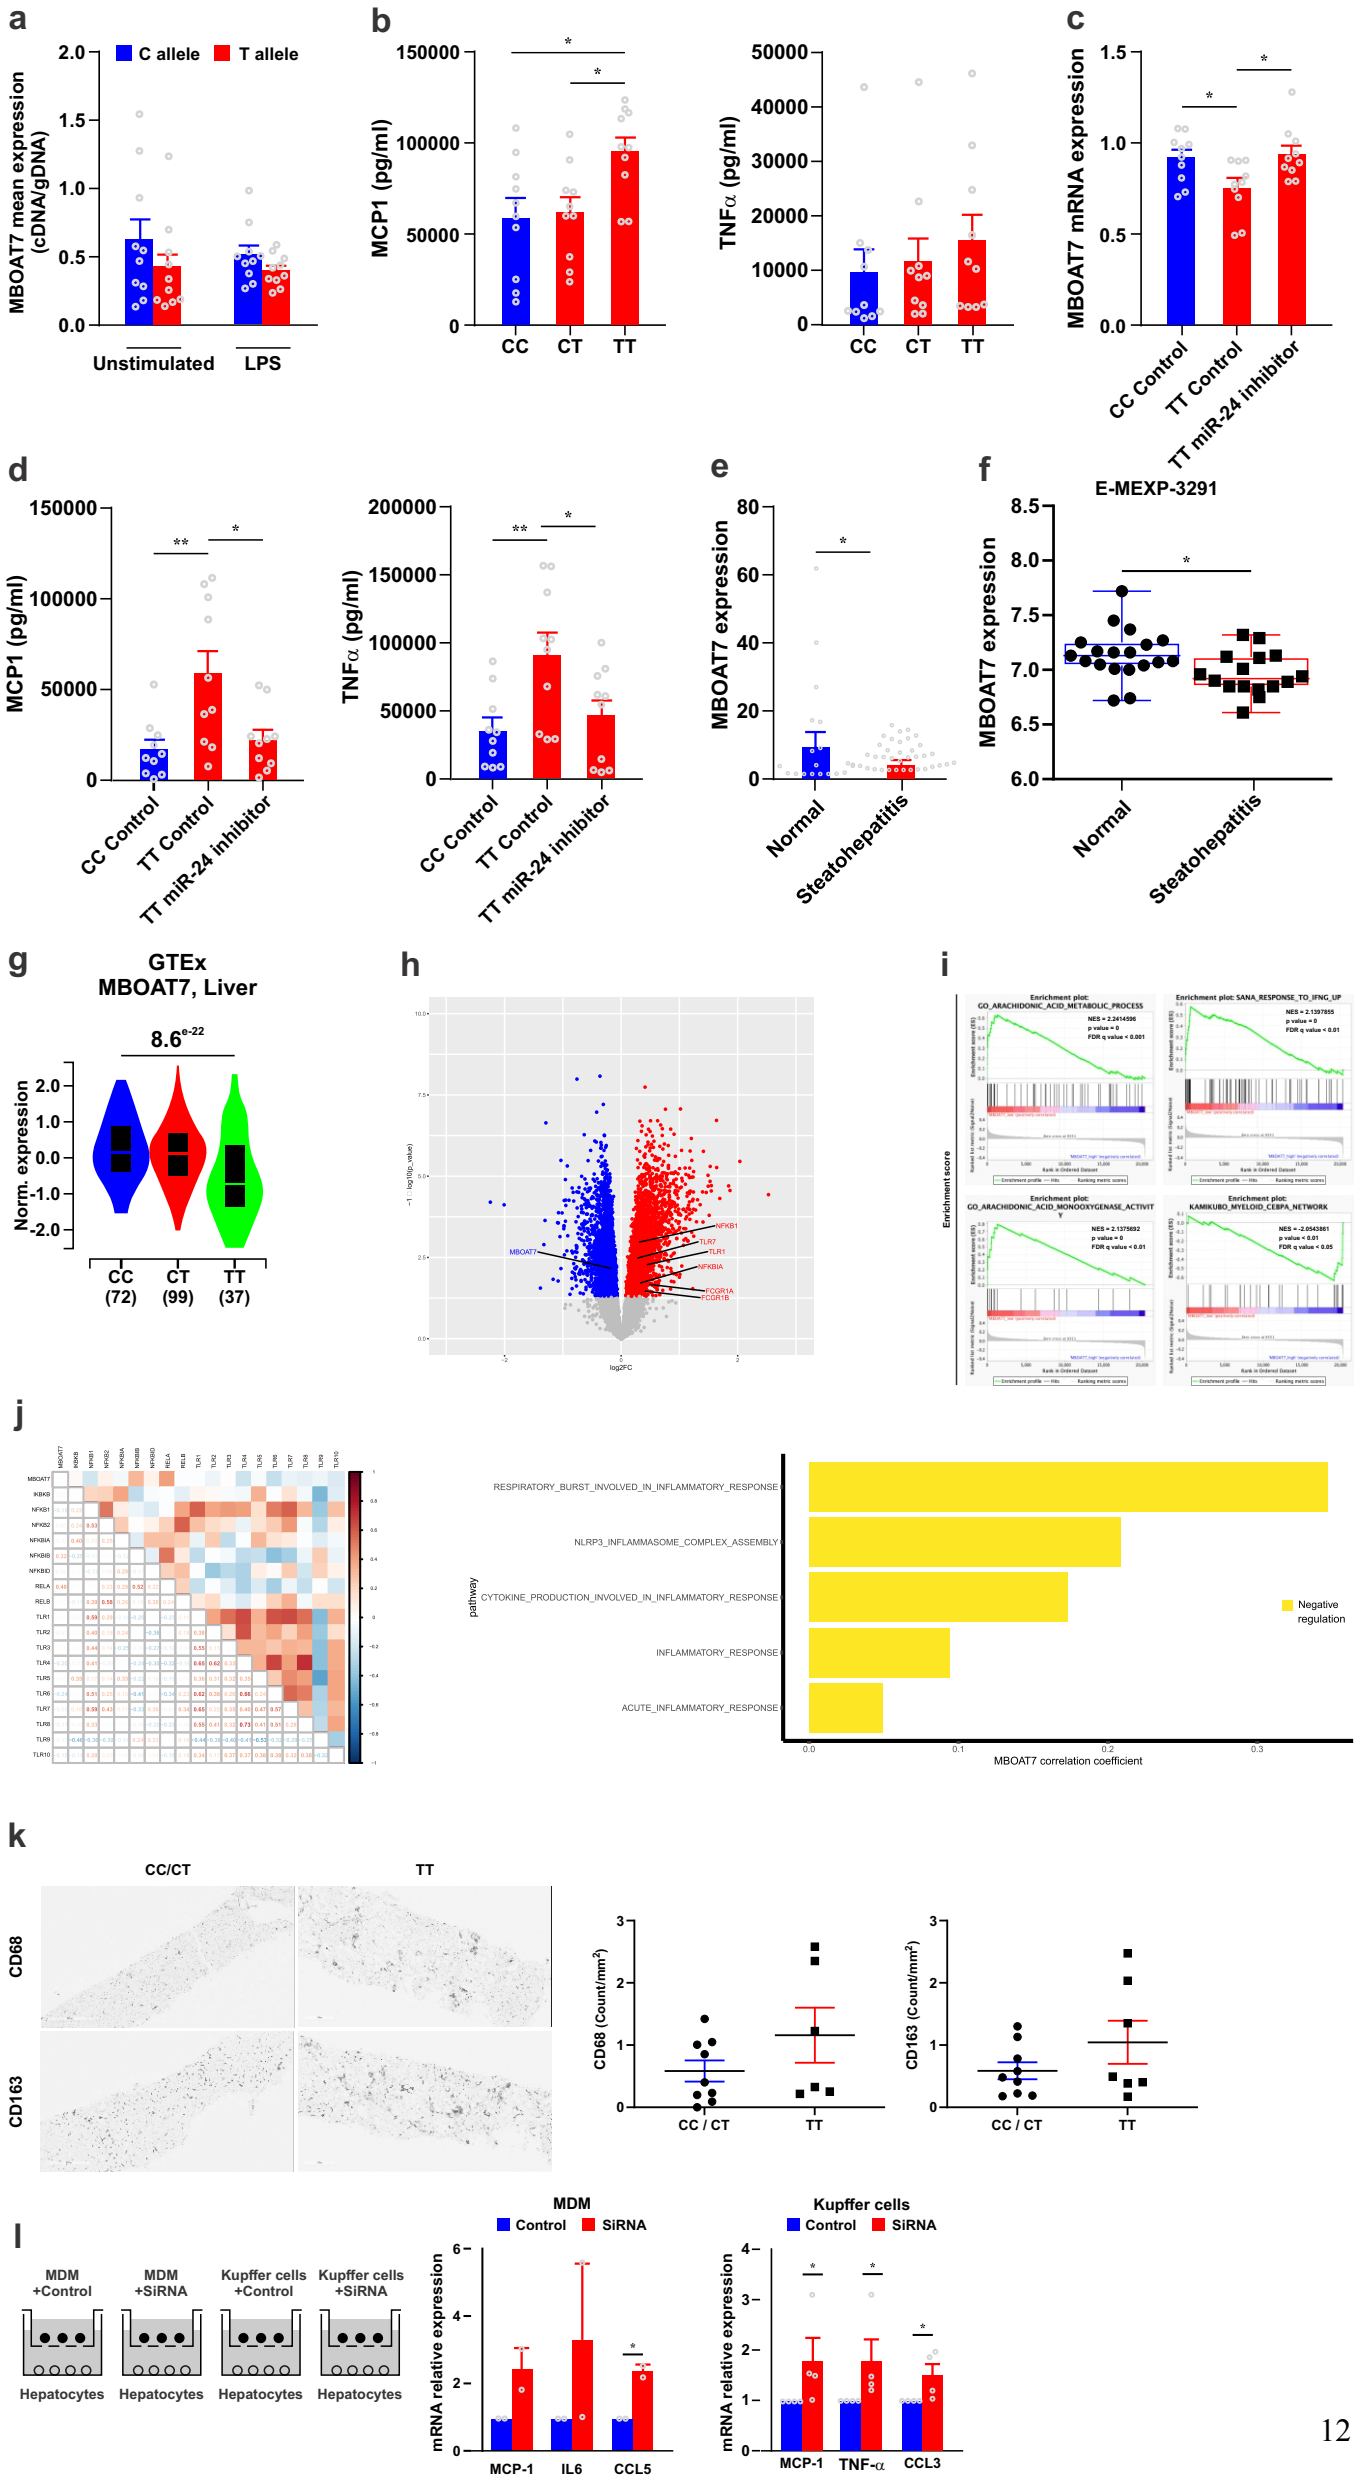

**Supplementary Figure 6:** Human MDMs isolated from patients with MAFLD and challenged with LPS for 24 hours (n= 10/group); **a)** Allele-specific expression assay showing the ratio of rs8736 alleles in genomic DNA (gDNA) and complementary DNA (cDNA) synthesized from pre-mRNA, **b)** Secreted MCP-1 and TNF- $\alpha$  levels measured by ELISA. MDMs from patients with MAFLD harbouring the CC genotype for rs8736 and transfected with miRNA control compared to subjects harbouring the TT genotype and transfected with either miRNA-24 inhibitor or control (n = 10/group); **c)** MBOAT7 relative mRNA expression assessed by RT-PCR, **d)** Secreted TNF- $\alpha$  and MCP-1 levels measured by ELISA. MBOAT7 relative mRNA expression **e)** by RT-PCR in control subjects (n=25) and patients with MAFLD related metabolic steatohepatitis (n=38), **f)** ArrayExpress public repository data (E-MEXP-3291) control subjects (n=19) and patients with MAFLD related metabolic steatohepatitis (n=16). **g)** MBOAT7 gene expression in the liver based on the Genotype-Tissue Expression (GTEx) dataset. **h)** Volcano plot and **i)** Gene Set Enrichment Analysis of inflammation pathways gene expression between the low and high expressed MBOAT7 samples in ArrayExpress public repository data (E-MEXP-3291). **j)** Heatmap of correlation (Pearson correlation) between hepatic MBOAT7 expression and inflammatory markers in E-MEXP-3291 dataset. Correlation between hepatic MBOAT7 expression and GSVA scores for inflammatory biological processes. **k)** Immunohistochemistry analysis of liver sections from patients with MAFLD harbouring CC/CT (n=9) or TT (n=6) genotype stained for sCD163 and CD68. Shown are representative immunohistochemistry images and summarized data. **l)** Diagram depicting the co-culture of primary human hepatocytes with MDMs or human Kupffer cells transfected with scramble or MBOAT7 siRNA for 48 hours and treated with LPS for 24 hours and relative mRNA expression of different cytokines in hepatocytes cultured with MDMs and with Kupffer cells assessed by q-PCR (n=2 and 4 includes 2 biological replicates and 1-2 technical replicates respectively). P-value < 0.02 for all comparisons. Values are represented by vertical bars and are mean  $\pm$  sem; \*P < 0.05, \*\* P < 0.01, \*\*\*\*P < 0.001. Statistical differences between groups were assessed by 2-tailed Student's t test or one-way ANOVA; multiple comparisons were corrected by Bonferroni correction. Source data are provided as a Source Data file.

### Supplementary 1 E:

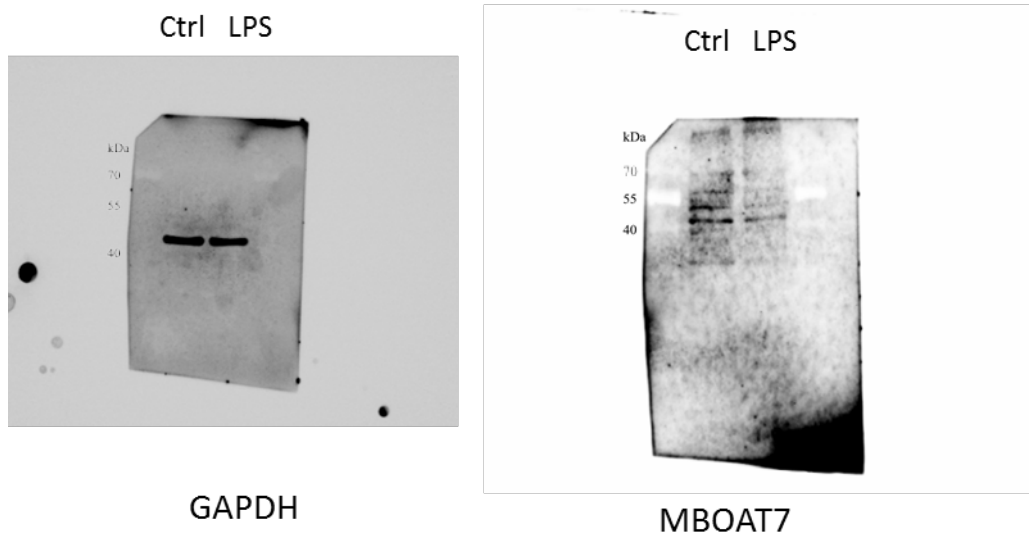

### Supplementary 2 A:

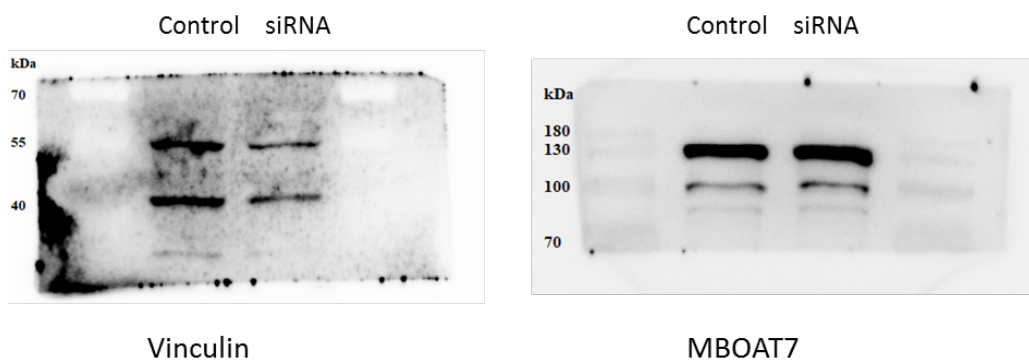

## Supplementary 4 B:

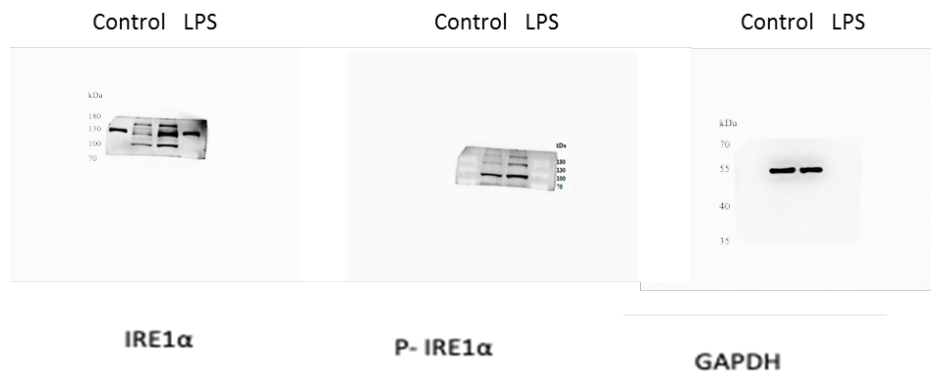

## Supplementary 5 D:

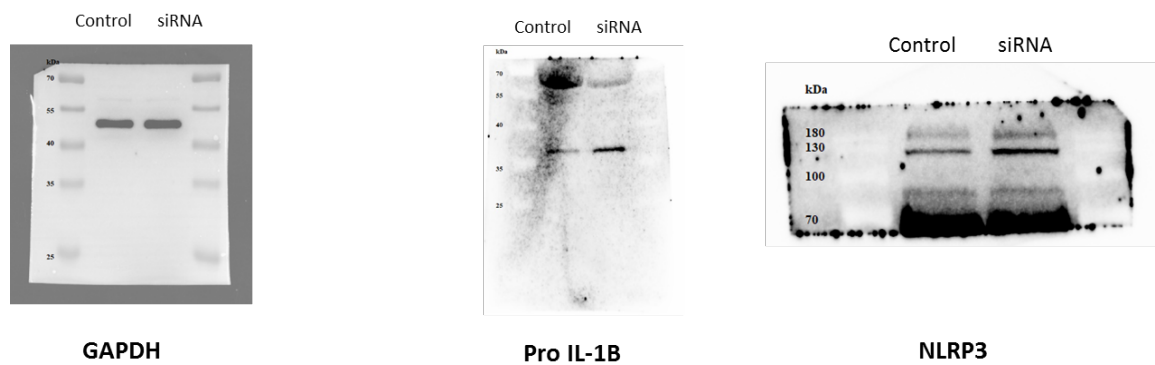

## Figure 4A

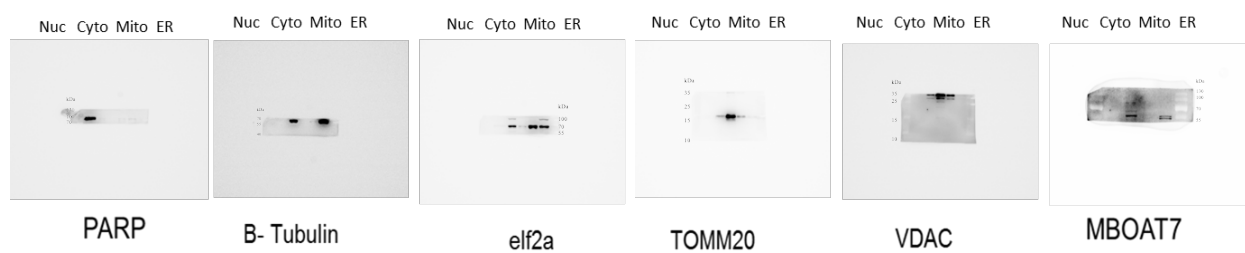

**Figure 4B**

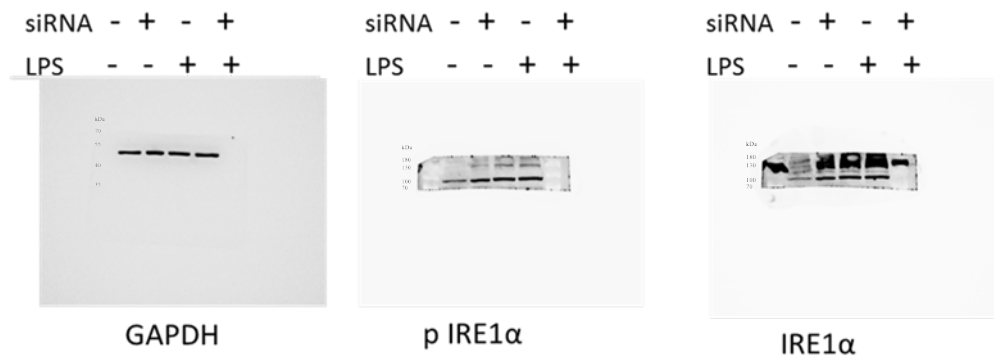

**Figure 7H**

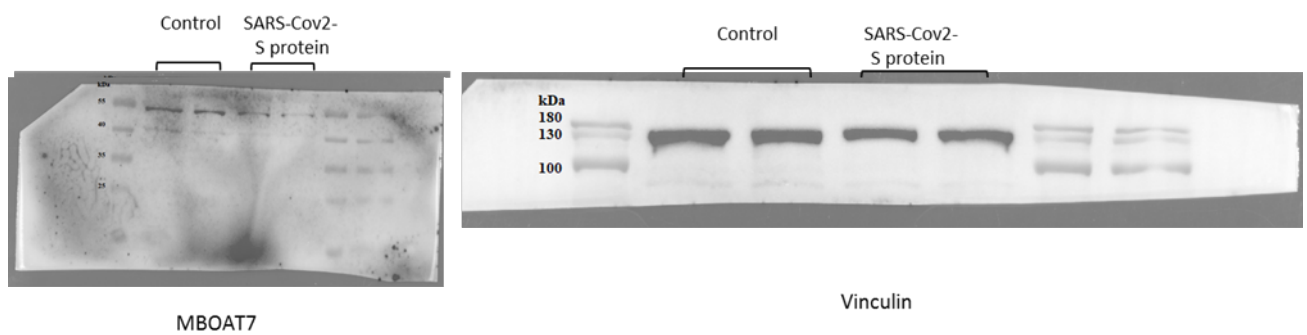

**Figure 7 N**

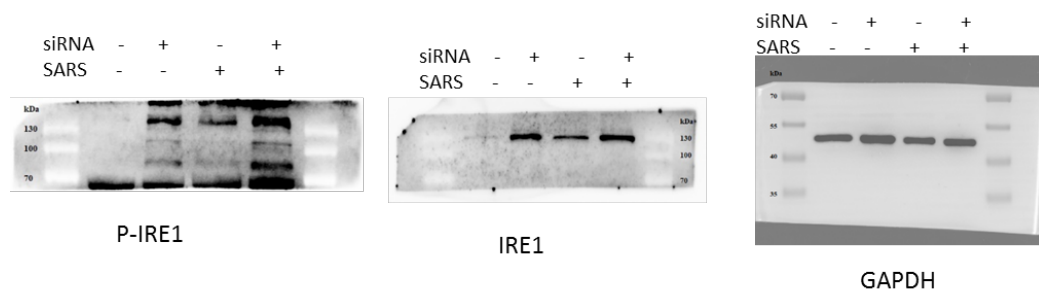

**Supplementary Table 1: Characteristics of the patient cohort with MAFLD**

| <b>Variables</b>                     | <b>NAFLD Cohort (n=30)</b> |
|--------------------------------------|----------------------------|
| <b>Age (years)</b>                   | 58.5 (44.7-63)             |
| <b>Male/ Female (%)</b>              | 17 (56.7%)/ 13 (43.3%)     |
| <b>BMI (Kg/m<sup>2</sup>)</b>        | 31.3 (25.5-36.5)           |
| <b>Patients with diabetes' (%)</b>   | 17 (56.7)                  |
| <b>ALT (IU/L)</b>                    | 51 (40.2-82.5)             |
| <b>AST (IU/L)</b>                    | 36 (19.7-58.5)             |
| <b>GGT (IU/L)</b>                    | 57.5 (30.7-177)            |
| <b>Platelets (x10<sup>9</sup>/L)</b> | 214 (180-246)              |

\*Data are given as median ± interquartile range or as %.



**Supplementary Table 2: A list of the used reagents**

| REAGENT or RESOURCE                                  | Source / Identifier                                          |
|------------------------------------------------------|--------------------------------------------------------------|
| <b>Antibodies</b>                                    | <b>Supplier name/ Catalog number / Clone name / Dilution</b> |
| anti-GAPDH                                           | Abcam (ab181602), monoclonal, 1/10000                        |
| anti-Vinculin                                        | Abcam (ab129002), monoclonal, 1/20000                        |
| anti-PARP                                            | Cell Signaling Technology (9542), monoclonal, 1/1000         |
| anti- $\beta$ -Tublin                                | Cell Signaling Technology (2128), monoclonal, 1/1000         |
| anti-EIF2A                                           | Abcam (ab169528), monoclonal, 1/1000                         |
| anti-TOMM20                                          | Abcam (ab186735), monoclonal, 1/1000                         |
| anti-VDAC                                            | Abcam (ab14734), monoclonal, 1 $\mu$ g/ml                    |
| anti-IL-1 $\beta$                                    | Cell Signaling (12242), monoclonal, 1/1000                   |
| anti-NLRP3                                           | AdipoGen (AG-20B-0014), monoclonal, 1 $\mu$ g/ml             |
| anti-pIRE1 $\alpha$ [p ser 724]                      | Novus Biologicals [NB100-2323], polyclonal, 1/1000           |
| anti-IRE1 $\alpha$                                   | Novus Biologicals [NB100-2324], polyclonal, 1/1000           |
| anti-MBOAT7                                          | Sapphire Bioscience (ARP49810), polyclonal, 1/500            |
| anti-CD163                                           | Cell Marque, MRQ-26, monoclonal, 1/50                        |
| anti-CD68                                            | Abcam, ab955, monoclonal, 1/500                              |
| <b>Bacterial and Virus Strains</b>                   |                                                              |
| NA                                                   |                                                              |
| <b>Chemicals, Peptides, and Recombinant Proteins</b> |                                                              |
| qScript cDNA SuperMix                                | Genescript                                                   |
| SYBR Green PCR Master Mix                            | Invitrogen                                                   |
| Bovine serum albumin (BSA)                           | Sigma Aldrich                                                |
| RIPA buffer                                          | Sigma Aldrich                                                |
| Trypsin                                              | Sigma Aldrich                                                |
| Protease inhibitors                                  | Sigma Aldrich                                                |
| Dimethyl sulfoxide (DMSO)                            | Sigma Aldrich                                                |
| $\beta$ -mercaptoethanol,                            | Sigma Aldrich                                                |
| EDTA (Ethylenediaminetetraacetic acid)               | Sigma Aldrich                                                |
| Actinomycin D                                        | Sigma Aldrich                                                |
| IL- $\beta$ protein                                  | Thermo fisher (A42508)                                       |

|                                                  |                                      |
|--------------------------------------------------|--------------------------------------|
| Penicillin                                       | Gibco BRL through Life Technologies  |
| Streptomycin                                     | Gibco BRL through Life Technologies  |
| Lipofectamine RNAi-MAX                           | Gibco BRL through Life Technologies  |
| Transfection Reagent                             | Gibco BRL through Life Technologies  |
| Opti-MEM medium                                  | Gibco BRL through Life Technologies  |
| Dulbecco's Modified Eagle Medium (DMEM)          | Lonza                                |
| RPMI 1640 Medium                                 | Lonza                                |
| Phosphate buffered saline (PBS)                  | Lonza                                |
| Recombinant Human M-CSF                          | Lonza                                |
| TheraPEAK™ X-VIVO™-15 Serum-free                 | Lonza                                |
| Hematopoietic Cell Medium,                       | Lonza                                |
| Ethanol, absolute                                | POCD Healthcare                      |
| Ficoll-Paque PLUS                                | GE Healthcare                        |
| Seahorse XF RPMI medium                          | In Vitro Technologies                |
| Glutamine solution                               | In Vitro Technologies                |
| Glucose solution                                 | In Vitro Technologies                |
| Pyruvate solution                                | In Vitro Technologies                |
| Cryo Human Kupffer cells                         | Life Technologies                    |
| TaqMan™ Fast Advanced Master Mix                 | Thermo Fisher Scientific             |
| <b>Critical Commercial Assays</b>                |                                      |
| Detergent Compatible (DC) Protein Assay Kit I    | Bio-Rad (5000111)                    |
| FavorPrep Tissue Total RNA Purification Mini Kit | Favorgen Biotech Corp (FATRK001-2)   |
| EasySep Human CD14 Positive Selection Kit II     | STEMCELL Technologies ( 17858 )      |
| Human TLR1-9 Agonist Kit                         | InvivoGen (tlrl-kit1hw)              |
| QIAGEN Plasmid Maxi Kit (25)                     | QIAGEN (12163)                       |
| QIAGEN miRNeasy Mini Kit                         | QIAGEN (217004)                      |
| DCFDA Cellular ROS Detection Assay Kit           | Abcam (ab113851)                     |
| Human TNF- $\alpha$ ELISA Kit                    | Abcam (ab46087)                      |
| Human MCP-1 ELISA Kit                            | Abcam (ab179886)                     |
| Human IL-6 ELISA Kit                             | Abcam (ab178013)                     |
| Human IL-1 $\beta$ ELISA Kit                     | Abcam (ab214025)                     |
| Seahorse XF Cell Mito Stress Test Kit            | In Vitro Technologies (SEA103015100) |
| Dual Luciferase (Firefly-Renilla) Assay System   | JOMAR BIOSCIENCE (60683-2)           |

|                                                                         |                                        |
|-------------------------------------------------------------------------|----------------------------------------|
| TMRE-Mitochondrial Membrane Potential Assay Kit                         | Abcam ab113852                         |
| MitoSOX™ Red Mitochondrial Superoxide Indicator                         | Thermo Fisher Scientific (M36008)      |
| OneStep qMethyl-PCR Kit                                                 | ZYMO Research (D5310)                  |
| GSK1210151A                                                             | Sigma-Aldrich (SML0666-5MG)            |
| Human Mitochondrial DNA Monitoring primer Set                           | Takara (7246)                          |
| Cytosolic Phospholipase A2 Assay Kit (ab133090)                         | Abcam (ab133090)                       |
| ATAC-Seq Kit                                                            | Active Motif (53150)                   |
| CUT&Tag-IT™ Assay Kit                                                   | Active Motif (53160)                   |
| Histone H3K27me3 antibody (pAb)                                         | Active Motif (39055)                   |
| Histone H3K4me1 antibody (pAb)                                          | Active Motif (39498)                   |
| ATP Colorimetric/Fluorometric Assay Kit                                 | Biovision (K354-100)                   |
| Deproteinizing Sample Preparation Kit                                   | Biovision (K808-200)                   |
| Lactate Colorimetric/Fluorometric Assay Kit                             | Biovision (K607-100)                   |
| Cyclooxygenase (COX) Activity Assay Kit (Fluorometric)                  | Abcam (ab204699)                       |
| Protease Inhibitor Cocktail (EDTA-free)                                 | Abcam (ab201111)                       |
| Lipoxygenase Assay Kit                                                  | Abcam (ab241038)                       |
| Cytosolic Phospholipase A2 Assay Kit                                    | Abcam (ab133090)                       |
| Fluo-8 Calcium Flux Assay Kit                                           | Abcam (ab112129)                       |
| Caspase-1 Assay Kit                                                     | Promega Corporation (G9951)            |
| Triglyceride Assay quantitation Kit                                     | Abcam (ab65336)                        |
| Cholesterol/Cholesteryl Ester quantitation Kit                          | Abcam (ab65359)                        |
| Tocris AACOCF3                                                          | Invitro Tec. RDS (14625)               |
| Indomethacin                                                            | Sigma-Aldrich (I7378-5G)               |
| Actinomycin D                                                           | Sigma-Aldrich (A1410-2MG)              |
| SARS-CoV-2 (2019-nCoV) Spike S1-His Recombinant Protein (HPLC-verified) | Jomar Life Research (40591-V08H-100UG) |
| Flagellin                                                               | Abcam (AB201366)                       |
| ATP                                                                     | Sigma (A2383-1G)                       |
| Poly(dA:dT)                                                             | Jomar Life Research                    |
| MDP                                                                     | Jomar Life Research                    |
| Mito-TEMPO                                                              | Sigma-Aldrich (SML0737)                |
| Carbonyl cyanide 3-chlorophenylhydrazone (CCCP )                        | Sigma-Aldrich                          |
| Potassium chloride solution                                             | Sigma-Aldrich                          |

|                                                          |                                                                                                                                                                                                                                                                                 |
|----------------------------------------------------------|---------------------------------------------------------------------------------------------------------------------------------------------------------------------------------------------------------------------------------------------------------------------------------|
| BAPTA-AM                                                 | Sigma-Aldrich                                                                                                                                                                                                                                                                   |
| <b>Experimental Models: Organisms/Strains</b>            |                                                                                                                                                                                                                                                                                 |
| NA                                                       |                                                                                                                                                                                                                                                                                 |
| <b>Oligonucleotides</b>                                  |                                                                                                                                                                                                                                                                                 |
| Assay ID: Hs02786624_g1 / GAPDH                          | Thermo Fisher Scientific (4448489)                                                                                                                                                                                                                                              |
| Assay ID: Hs04270764_pri, hsa-mir-23a                    | Thermo Fisher Scientific (4427012)                                                                                                                                                                                                                                              |
| SNP ID: MBOAT7rs8736 C_2916339_10                        | Thermo Fisher Scientific (4351376)                                                                                                                                                                                                                                              |
| mirVana™ miRNA Inhibitor, Negative Control               | Thermo Fisher Scientific (4464076)                                                                                                                                                                                                                                              |
| hsa-miR-24-2-5p mirVana® miRNA inhibitor                 | Thermo Fisher Scientific (4464084)                                                                                                                                                                                                                                              |
| hsa-miR-24-2-5p mirVana® miRNA mimic                     | Thermo Fisher Scientific (4464066)                                                                                                                                                                                                                                              |
| <b>Other</b>                                             |                                                                                                                                                                                                                                                                                 |
| LENG4(MBOAT7) Human Tagged ORF Clone                     | OriGene                                                                                                                                                                                                                                                                         |
| pCMV6-AC-GFP Tagged Cloning Vector                       | OriGene                                                                                                                                                                                                                                                                         |
| siGENOME SMARTpool human MBOAT7                          | Dharmacon Cat. No. M-010084-01-0005                                                                                                                                                                                                                                             |
| On-TARGET plus Non-Targeting pool                        | Dharmacon Cat. No. D-001810-10-05                                                                                                                                                                                                                                               |
| LENG4 (MBOAT7) Human siRNA Oligo Duplex (Locus ID 79143) | ORIGENE Cat. No. SR312359                                                                                                                                                                                                                                                       |
| s18102 human PERK Silencer select                        | Thermo fisher (4427038)                                                                                                                                                                                                                                                         |
| s200430 human IRE1 $\alpha$ Silencer select              | Thermo fisher (4427038)                                                                                                                                                                                                                                                         |
| s223543 human ATF6 Silencer select                       | Thermo fisher (4427037)                                                                                                                                                                                                                                                         |
| TLR4 siRNA                                               | Thermo fisher (4427038)                                                                                                                                                                                                                                                         |
| s13563 human STIM1 Silencer® Select                      | Thermo fisher (4427037)                                                                                                                                                                                                                                                         |
| s228396 human ORAI1 Silencer® Select                     | Thermo fisher (4427037)                                                                                                                                                                                                                                                         |
| Silencer™ Select Negative Control No. 1 siRNA            | Thermo fisher 4390843                                                                                                                                                                                                                                                           |
| <b>Software and Algorithms</b>                           |                                                                                                                                                                                                                                                                                 |
| ImageJ bundled with 64-bit Java 8                        | <a href="https://wsr.imagej.net/distros/win/ij153-win-java8.zip">https://wsr.imagej.net/distros/win/ij153-win-java8.zip</a>                                                                                                                                                     |
| GraphPad Prism 9                                         | <a href="http://www.graphpad.com/scientificsoftware/prism/">http://www.graphpad.com/scientificsoftware/prism/</a>                                                                                                                                                               |
| StepOne Software v2.3                                    | <a href="https://www.thermofisher.com/hk/en/home/technical-resources/software-downloads/StepOne-and-StepOnePlus-Real-Time-PCR-System.html">https://www.thermofisher.com/hk/en/home/technical-resources/software-downloads/StepOne-and-StepOnePlus-Real-Time-PCR-System.html</a> |
| R version 3.6.1                                          | <a href="https://cran.r-project.org/bin/windows/base/old/3.6.1/">https://cran.r-project.org/bin/windows/base/old/3.6.1/</a>                                                                                                                                                     |
| STAR version 2.7.2b (Dobin, 2013 #573)                   | <a href="https://www.ncbi.nlm.nih.gov/pubmed/23104886">https://www.ncbi.nlm.nih.gov/pubmed/23104886</a>                                                                                                                                                                         |
| Cuffdiff2 version 2.2.1 (Trapnell, 2013 #572)            | <a href="https://bioinformatics.home.com/tools/rna-seq/descriptions/Cuffdiff-2.html">https://bioinformatics.home.com/tools/rna-seq/descriptions/Cuffdiff-2.html</a>                                                                                                             |

|                                  |                                                                                                                                                                                                                                                                                                                                                                                         |
|----------------------------------|-----------------------------------------------------------------------------------------------------------------------------------------------------------------------------------------------------------------------------------------------------------------------------------------------------------------------------------------------------------------------------------------|
| Ingenuity Pathway Analysis (IPA) | <a href="https://www.qiagen.com/us/products/discovery-and-translational-research/next-generation-sequencing/informatics-and-data/interpretation-content-databases/ingenuity-pathway-analysis/">https://www.qiagen.com/us/products/discovery-and-translational-research/next-generation-sequencing/informatics-and-data/interpretation-content-databases/ingenuity-pathway-analysis/</a> |
| Bowtie2 version 2.4.4            | <a href="https://bowtie-bio.sourceforge.net/bowtie2/index.shtml">https://bowtie-bio.sourceforge.net/bowtie2/index.shtml</a>                                                                                                                                                                                                                                                             |
| Homer version 4.11               | <a href="http://homer.ucsd.edu/homer/">http://homer.ucsd.edu/homer/</a>                                                                                                                                                                                                                                                                                                                 |
| deepTools(version 3.5.1)         | <a href="https://deeptools.readthedocs.io/en/develop/content/installation.html">https://deeptools.readthedocs.io/en/develop/content/installation.html</a>                                                                                                                                                                                                                               |

**Supplementary Table 3: A list of the sequence of primers**

| Primers       |                                                                   |
|---------------|-------------------------------------------------------------------|
| GAPDH         | For: AAGGTGAAGGTCGGAGTCAAG<br>Rev: GGGGTCATTGATGGCAACAATA         |
| TNF- $\alpha$ | For: TCTCTAATCAGCCCT<br>Rev: TACAACATGGGCTAC                      |
| IL-6          | For: TGCAATAACCACCCCTGACC<br>Rev: ATTTGCCGAAGAGCCCTCAG            |
| MCP-1         | For: TGC CGC CCT TCT GTG CCT G<br>Rev: ACA GCA GGT GAC TGG GGC AT |
| CCL3          | For: TGCAACCAGTTCTCTGCATC<br>Rev: AATCTGCCGGGAGGTGTA              |
| CCL5          | For: CAACCCAGCAGTCGTCTTTG<br>Rev: TCCCGAACCCATTCTTCTC             |
| IL1RA         | For: GTGCTTTGGTACAGGGATTCTG<br>Rev: CACAGTCAGAGGTAGACCCTTC        |
| MBOAT1        | For: GTTTCCACAGCTTGCCAGA<br>Rev: AGGTGATGCCCAACTTGTGT             |
| MBOAT2        | For: TCTGGTGAAAATGGAAAAGAAGA Rev:<br>GCTTCTGAACAACCGCAGTA         |
| MBOAT3        | For: TGACCTTTGATCGCTTCCAT<br>Rev: TCACCCTCGCGTCTCACT              |
| MBOAT5        | For: TGACATACCAGGAAAGATACCAA Rev:<br>GGTAGAAAAGGCCCAGACTCA        |
| MBOAT7        | For: CATGCGGTACTGGAACATGA<br>Rev: CCAGTAGGCGCTCAGCAG              |
| BIP           | For: TGTTCAACCAATTATCAGCAAATC<br>Rev: TTCTGCTGTATCCTCTTCACCAGT    |
| ERDJ4         | For: GCTACTCCCCAGTCAATTTTCA<br>Rev: CCGATTTTGGCACACCTAAGAT        |
| IREA1         | For: GAAGATCCAGTCCTGCAGGTC<br>Rev: AGAAGAGAGGTTGATGGGCAG          |

|                   |                                                                |
|-------------------|----------------------------------------------------------------|
| sXBP-1            | For: CTGCCAGAGATCGAAAGAAGGC<br>Rev: CTCCTGGTTCTCAACTACAAGGC    |
| Affymetrix MBOAT7 | For: AATATTGCAGACTTGGAAGG<br>Rev: CAACACTTTATTGGGAAAGATT       |
| Zymo MBOAT7       | For: TTCTACGTGGCCTGGATTG<br>Rev: GTTGCGGATGGTCTCATAGT          |
| DRP1              | For: CAAAGCAGTTTGCCTGTGGA<br>Rev: TCTTGGAGGACTATGGCAGC         |
| STAT2             | For: CCGGGACATTCAGCCCTTTT<br>Rev: CTCATGTTGCTGGCTCTCCA         |
| MIEF1             | For: AGGATGACAATGGCATTGGC<br>Rev: CCGATCGTACATCCGCTTAAC        |
| PRKN              | For: AACATCAGTAGCTTTGCACCTG<br>Rev: GGGGGAGTGATGCTATTTTT       |
| NRF1              | For: GGAGGAGTTCAATGAACTGCTGTC<br>Rev: CTCTGGACCTTCTGCTTCATCTGT |
| PGC-1 $\alpha$    | For: AGCCTCTTTGCCAGATCTT<br>Rev: GGCAATCCGTCTTCATCCAC          |
| TFAM              | For: GGCAAGTTGTCCAAAGAAACC<br>Rev: GCATCTGGGTTCTGAGCTTTA       |
| UQCRC2            | For: AATTTTCGTCGTTGGGAAGTAGC<br>Rev: ATGAGTCTGCGGATTCTGAAAG    |
| MT-CO1            | For: GAGCTGCTGTTCCGGTGTC<br>Rev: TGCCAGTGGTAGAGATGGTTG         |
| ATP5A1            | For: ATGACGACTTATCCAAACAGGC<br>Rev: CGGGAGTGTAGGTAGAACACAT     |
| SOD2              | For: CTGCTGGGGATTGATGTGTGG<br>Rev: TGCAAGCCATGTATC TTTCAG T    |
| MFN1              | For: CCTGGCATCCAGGAGTTAGA<br>Rev: TGGTTCCAGCAATGCGATTT         |
| MFN2              | For: TGCAGGTGTAAGGGACGATT<br>Rev: GAGGCTCTGCAAATGGGATG         |
| FAM73B            | For: CTCCTGCAGGTGGTAGGC                                        |

|              |                                                                         |
|--------------|-------------------------------------------------------------------------|
|              | Rev: CAGAGACTGCATCAGAGCCA                                               |
| SIRT1        | For: TGGCAAAGGAGCAGATTAGTAGG<br>Rev: CTGCCACAAGAACTAGAGGATAAGA          |
| PERK         | For: GTCCCAAGGCTTTGGAATCTGTC<br>Rev: CCTACCAAGACAGGAGTTCTGG             |
| ATF6         | For: CAGACAGTACCAACGCTTATGCC<br>Rev: GCAGAACTCCAGGTGCTTGAAG             |
| Catalase     | For: AATCAGAAGGCAGTCCTCCC<br>Rev: TCGGGGAGCACAGAGTGAC                   |
| NDUFB8       | For: GCTCCCTGACCGCTCACAGC<br>Rev: TGCCAGTGCATCGGTTACCCC                 |
| SDHB         | For: GACACCAACCTCAATAAGGTCTC<br>Rev: GGCTCAATGGATTTGTACTGTGC            |
| p40phox      | For: CCTATGACTCAGAGCAGGTG<br>Rev: TCTTCGTAGTAGTAGCAACG                  |
| p47phox      | For: ACCCAGCCAGCACTATGTG<br>Rev: TTGCCTTCATCTGACAGAACC                  |
| p67-phox     | For: CGAGGGAACCAGCTGATAGA<br>Rev: CATGGGAACACTGAGCTTCA                  |
| STIM1        | For: 5- CACACTCTTTGGCACCTTCC-3'<br>Rev: 5-TGACAATCTGGAAGCCACAG-3'       |
| ORAI1        | For: 5-ACTGGATCGGCCAGAGTTAC-3'<br>Rev: 5-CGGCTCAAGTAGAGCTTGC-3'         |
| IL-1 $\beta$ | For: 5'-CCACAGACCTTCCAGGAGAATG-3'<br>Rev: 5'-GTGCAGTTCAGTGATCGTACAGG-3' |
